# Supplementary material for: Biochemical characterization and discovery of inhibitors for PfSir2A: new tricks for an old enzyme
Source: Royal Society of Chemistry journal article supplement (doi:10.1039/d4cb00206g), 2025-01-01

## Raw Data Files for Gels and Blots

### Biochemical Characterization and Inhibitor Discovery for *Pf*Sir2A – New Tricks for An Old Enzyme

Dickson Donu<sup>‡</sup>, Emily Boyle<sup>‡</sup>, Alyson Curry<sup>‡</sup>, Yana Cen<sup>‡#,\*</sup>

<sup>‡</sup>*Department of Medicinal Chemistry, Virginia Commonwealth University, Richmond, VA 23219*

<sup>#</sup>*Center for Drug Discovery, Virginia Commonwealth University, Richmond, VA 23219*

\*Correspondence: [ceny2@vcu.edu](mailto:ceny2@vcu.edu), phone: 804-828-7405

**Figure 1.** Analysis of *Pf*Sir2A interaction with DNAs.

**A**

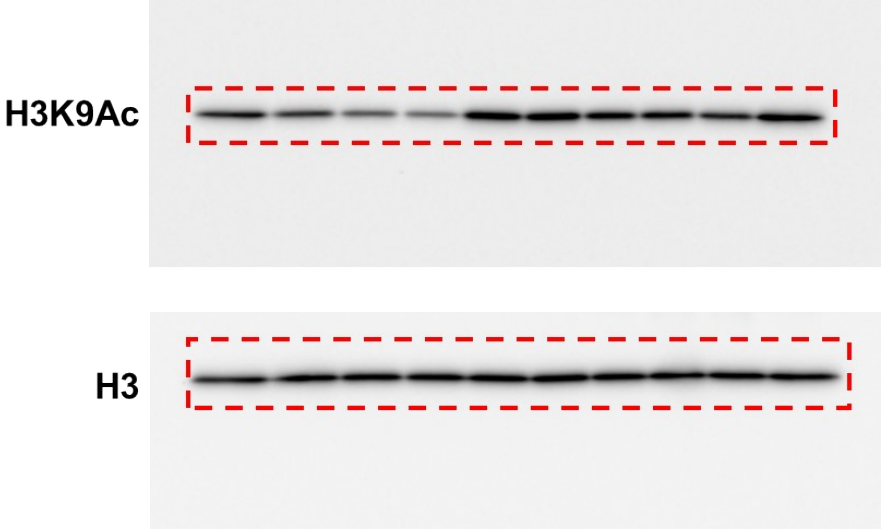

**C**

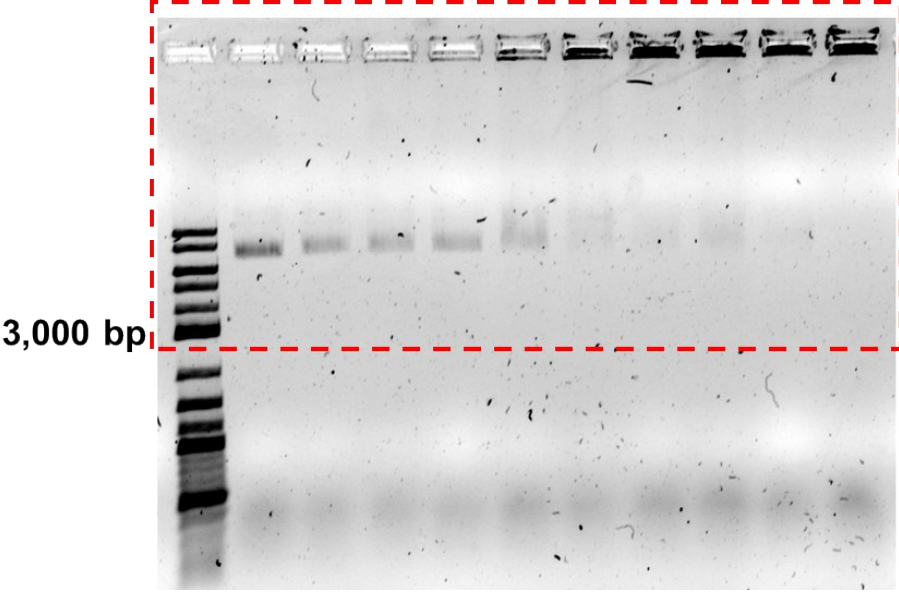

**D**

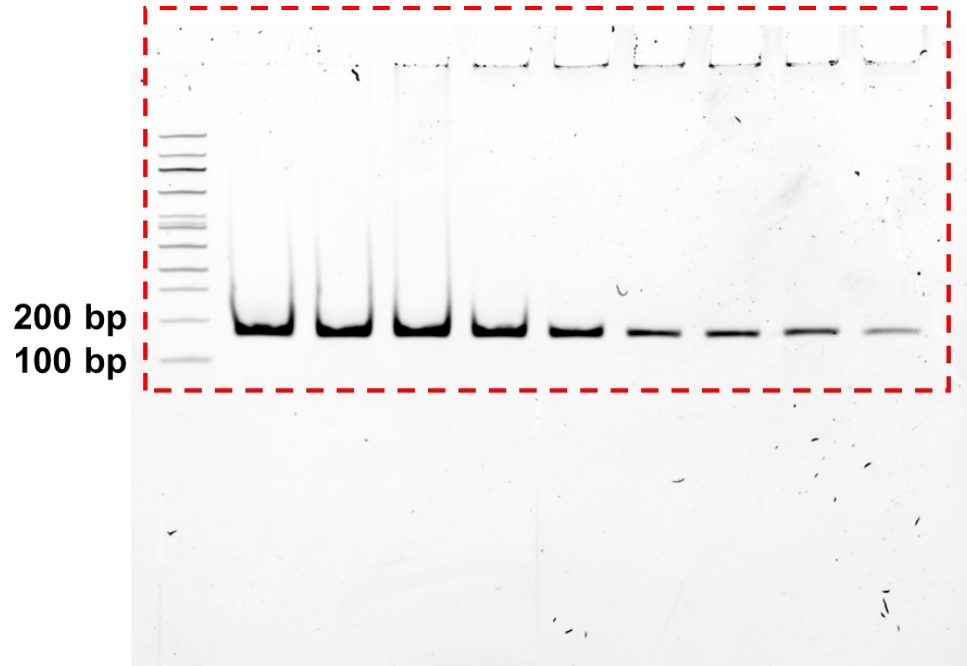

**Figure 2.** Defatty-acylase activity of *Pf*Sir2A can be activated by dsDNA.

**B**

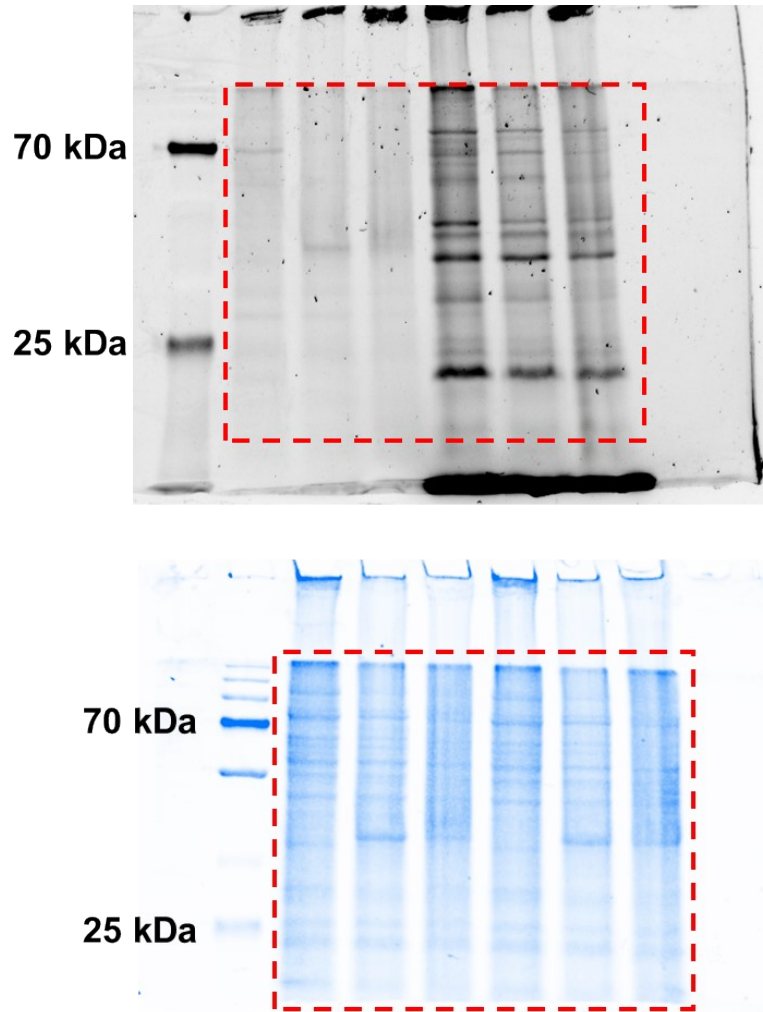

**Figure 4.** *PfSir2A* demonstrates nucleosome-dependent deacetylase activity.

**A**

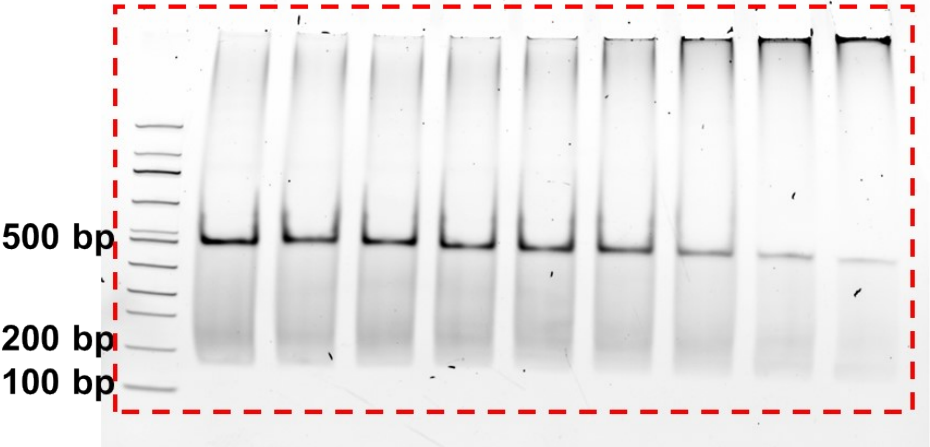

**C**

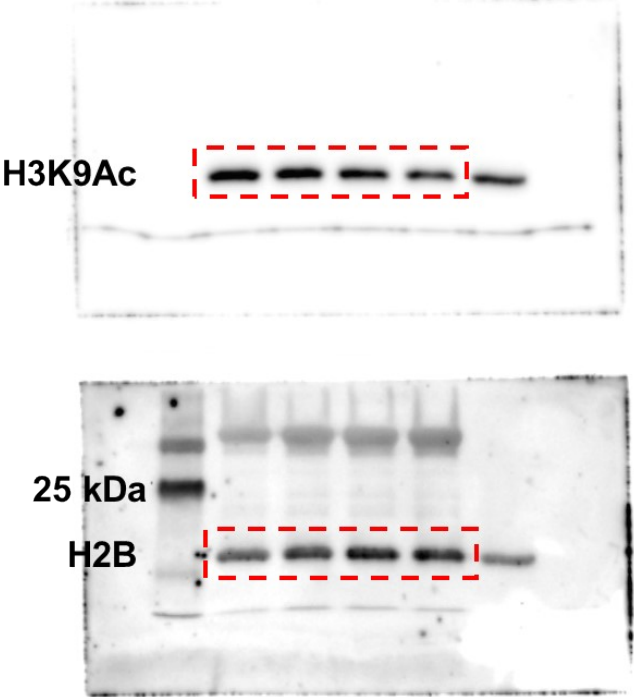

**Figure 5.** Discovery of *Pf*Sir2A inhibitor from a human sirtuin regulator library.

**D**

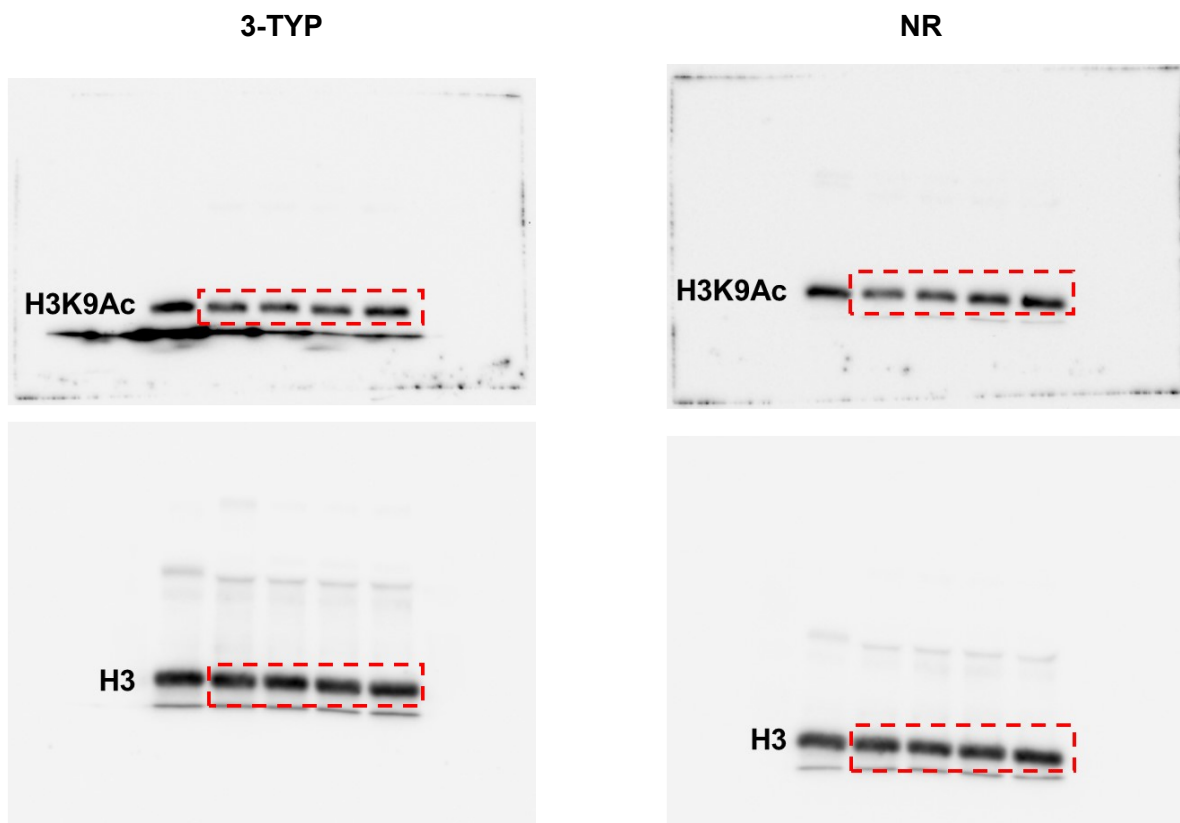

Supplement: d4cb00206g1.pdf [file d4cb00206g1.pdf]
