# Supplementary material for: Biochemical characterization and discovery of inhibitors for PfSir2A: new tricks for an old enzyme
Source: Royal Society of Chemistry journal article supplement (doi:10.1039/d4cb00206g), 2025-01-01
Supplement: d4cb00206g2.pdf [file d4cb00206g2.pdf]

## Supporting Information

### Biochemical Characterization and Inhibitor Discovery for *Pf*Sir2A – New Tricks for An Old Enzyme

Dickson Donu<sup>‡</sup>, Emily Boyle<sup>‡</sup>, Alyson Curry<sup>‡</sup>, Yana Cen<sup>‡,#,\*</sup>

<sup>‡</sup>*Department of Medicinal Chemistry, Virginia Commonwealth University, Richmond, VA 23219*

<sup>#</sup>*Center for Drug Discovery, Virginia Commonwealth University, Richmond, VA 23219*

\*Correspondence: [ceny2@vcu.edu](mailto:ceny2@vcu.edu), phone: 804-828-7405

**Figure S1.** Michealis-Menten kinetic analysis of 3-TYP inhibition.

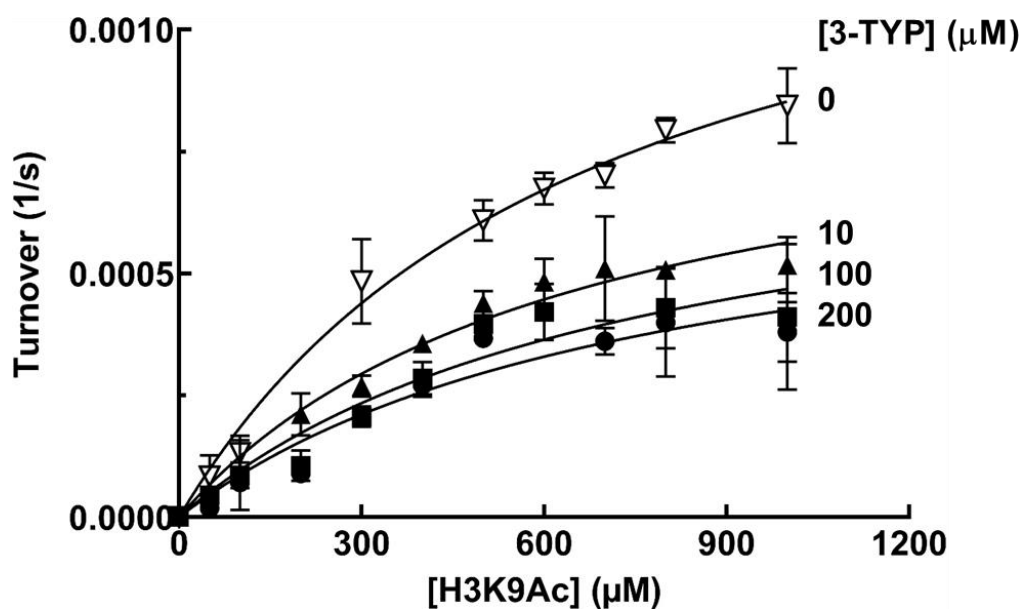

The mode of inhibition analysis of 3-TYP was performed as described in “Methods and Materials”. With increasing concentrations of 3-TYP, the  $K_m$  value remains roughly unchanged, while the  $V_{max}$  is significantly reduced.

**Figure S2.** Michealis-Menten kinetic analysis of NR inhibition.

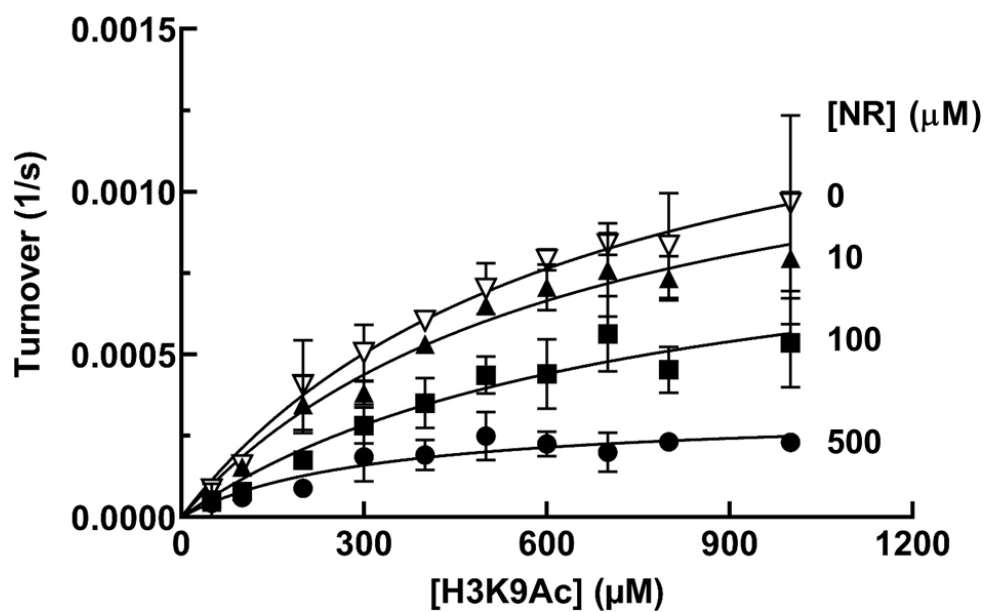

The mode of inhibition analysis of NR was performed as described in “Methods and Materials”. Increasing NR concentration leads to markedly decreased  $V_{max}$ , but negligible changes to the  $K_m$ .
